# Supplementary material for: Sporadic and Familial Congenital Cataracts: Mutational Spectrum and New Diagnoses Using Next‐Generation Sequencing
Source: PubMed Central journal article supplement — Hum Mutat. 2016 Jan 14;37(4):371–84. doi: 10.1002/humu.22948 (PMC4787201; doi:10.1002/humu.22948), 2016-01-14
Supplement: HUMU-37-371-s001.pdf [file HUMU-37-371-s001.pdf]

## **SUPPORTING INFORMATION**

**Supp. Figure S1.** Pedigrees of sporadic and familial cases examined in this study

**Supp. Figure S2.** Pedigrees with variants and Sanger sequencing results

**Supp. Table S1.** Clinical features in 46 families with sporadic and familial cataracts

**Supp. Table S2.** List of Cataract Genes

**Supp. Tables S3 A-D.**

3A. & 3B. NGS analysis and variant prioritization for TruSeq (A) and TruSight (B)

3C. & 3D. Gaps on the TruSeq (C) and TruSight (D) platforms

**Supp. Table S4.** Families with likely non-causative variants

**Supp. Figure S1.** Pedigrees of sporadic and familial cases examined in this study. Proband is indicated by arrows, asterisk indicates with DNA available.

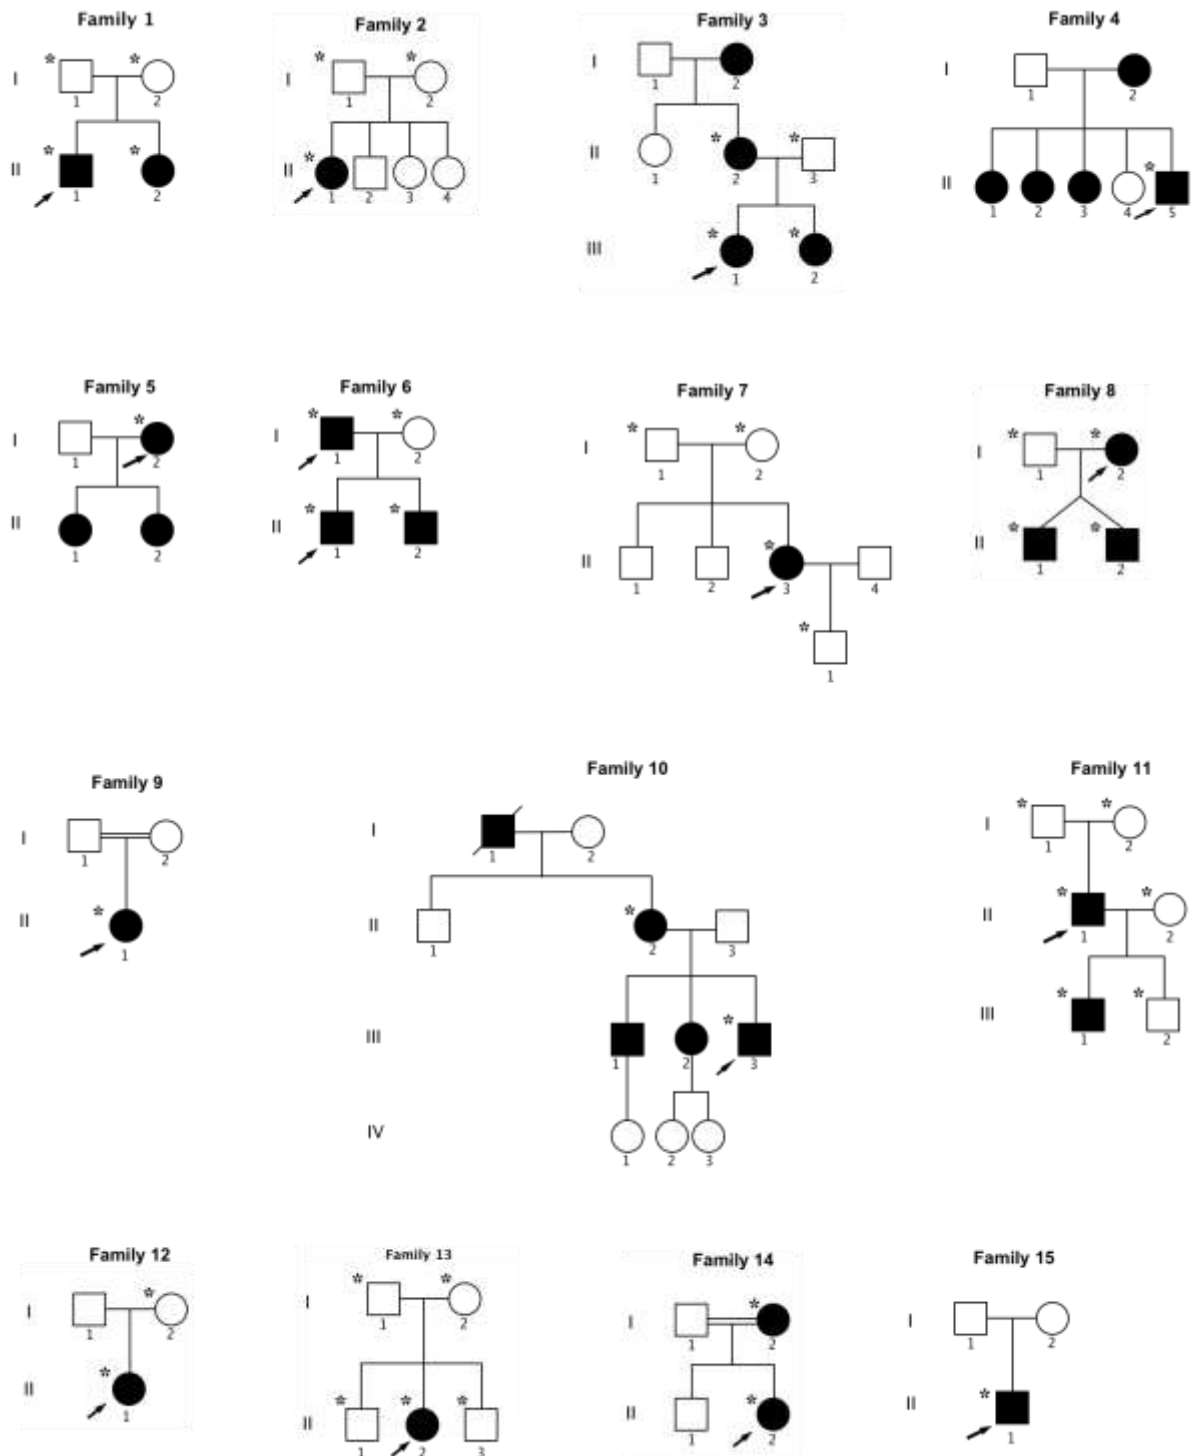

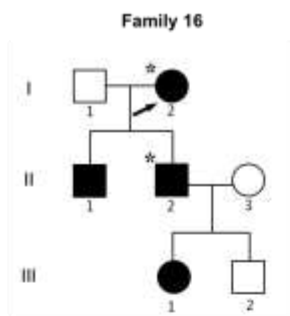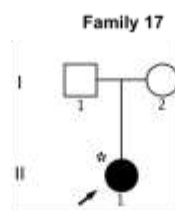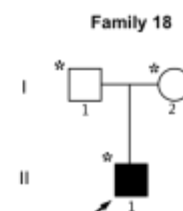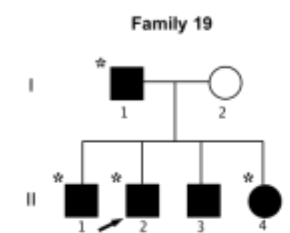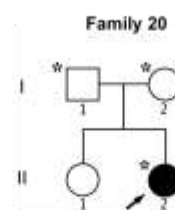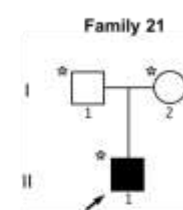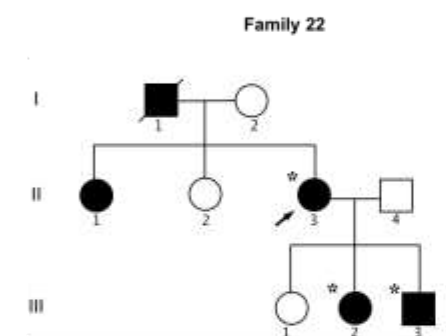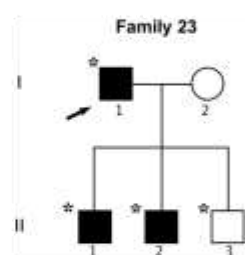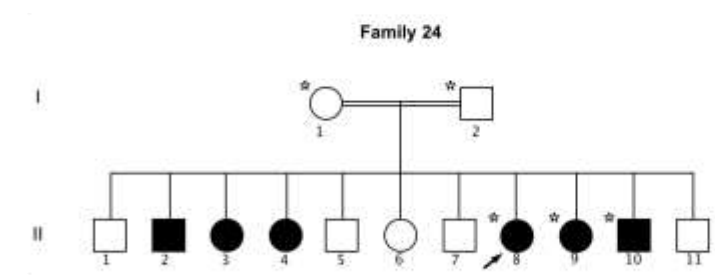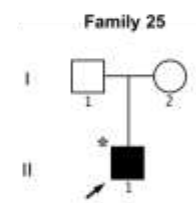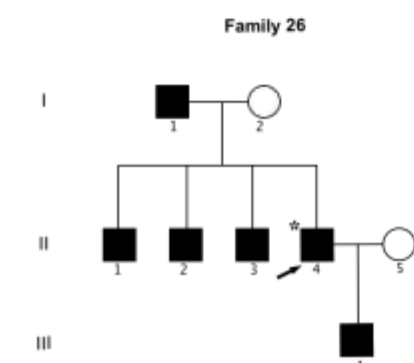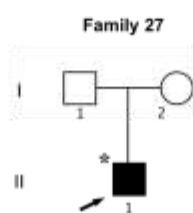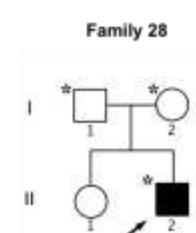

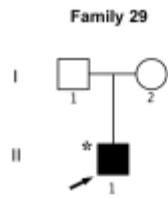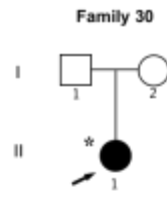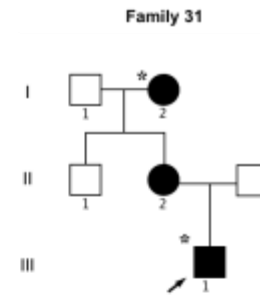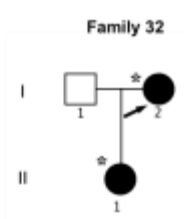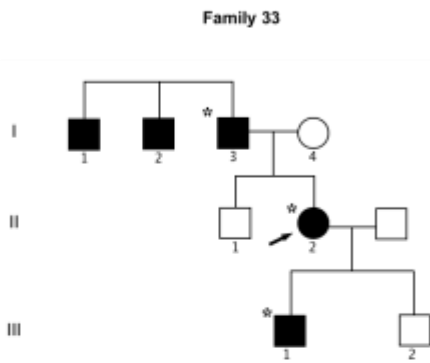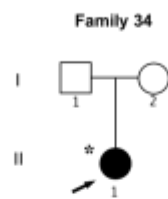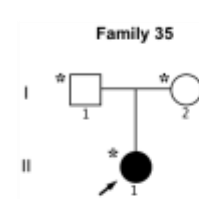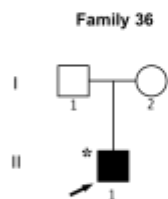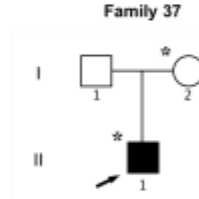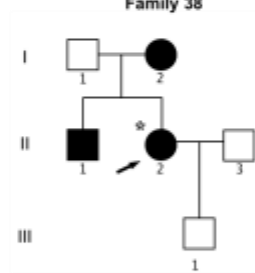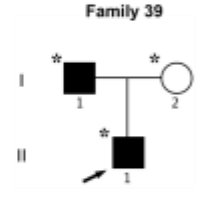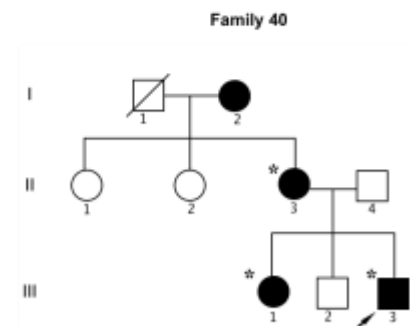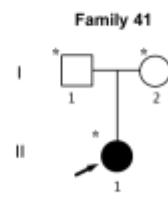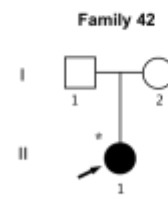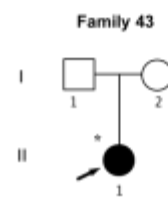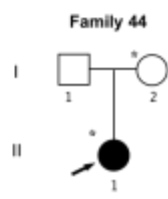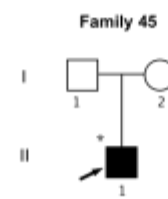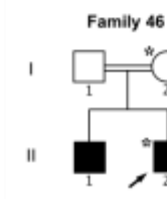

**Supp. Figure S2.** Pedigrees with variants and Sanger sequencing results.

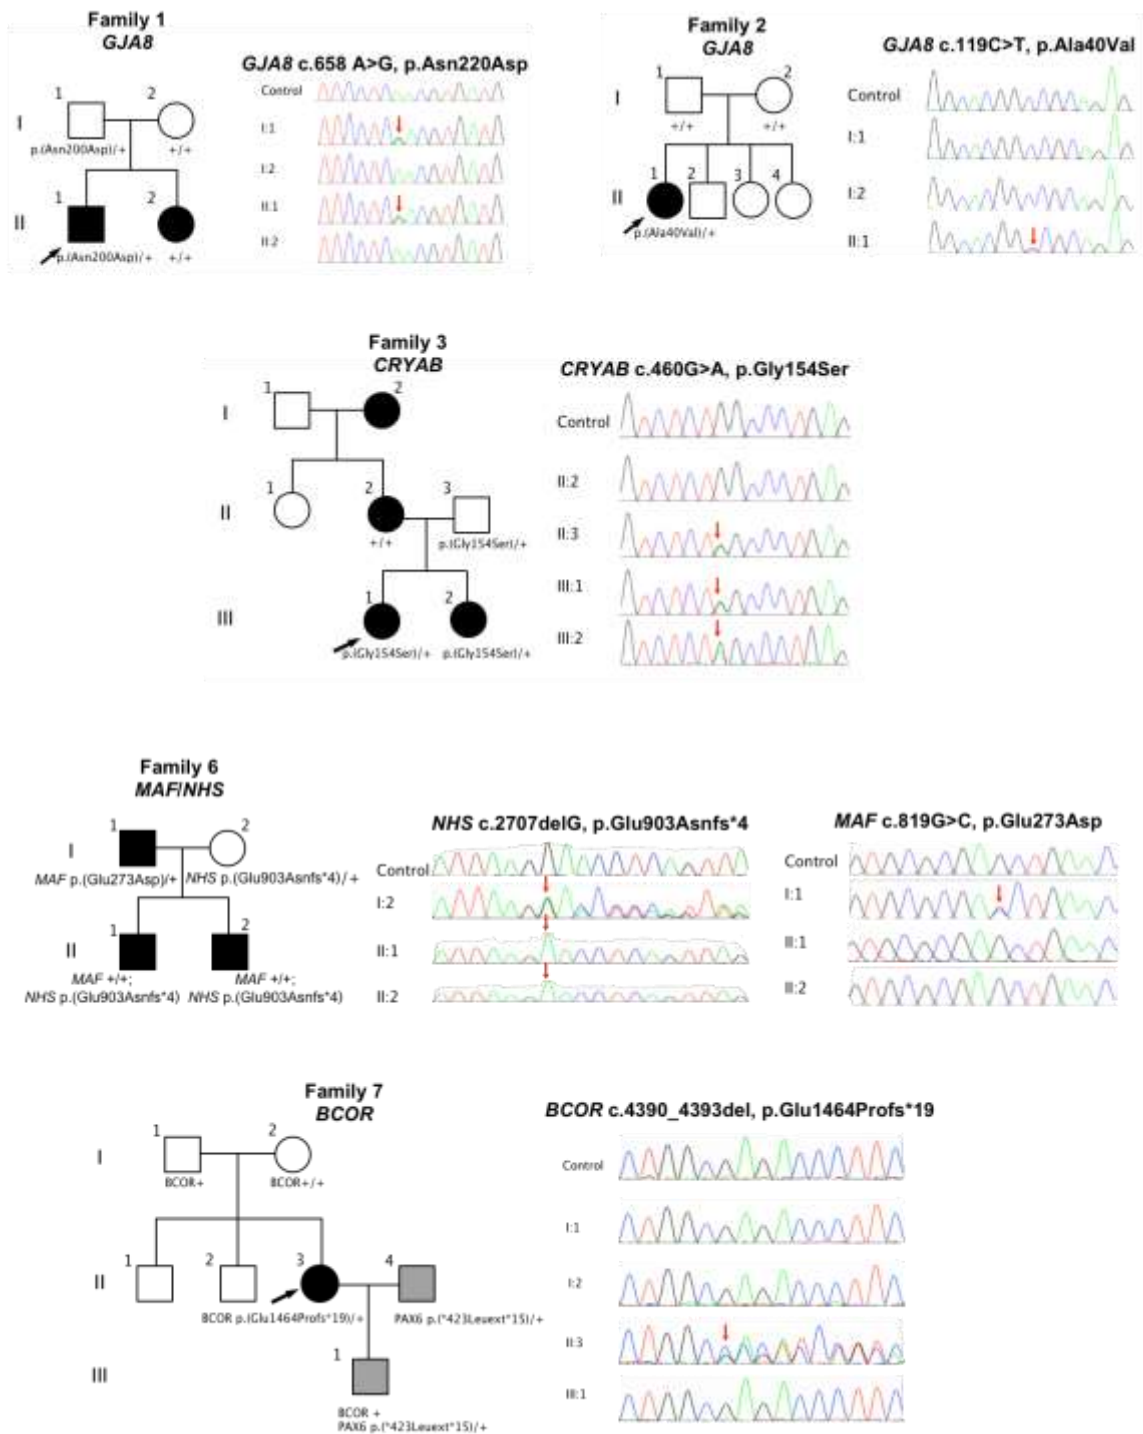

Note: Family 7 is previously reported in the literature (Willcock, et al., 2006) with a *PAX6* c.1268A>T, p.(\*423Leuext\*15) mutation in the father (II:4) and son (III:1) with variant aniridia (highlighted in grey in the pedigree). Family 8 was previously reported in the literature (Prokudin, et al., 2014).

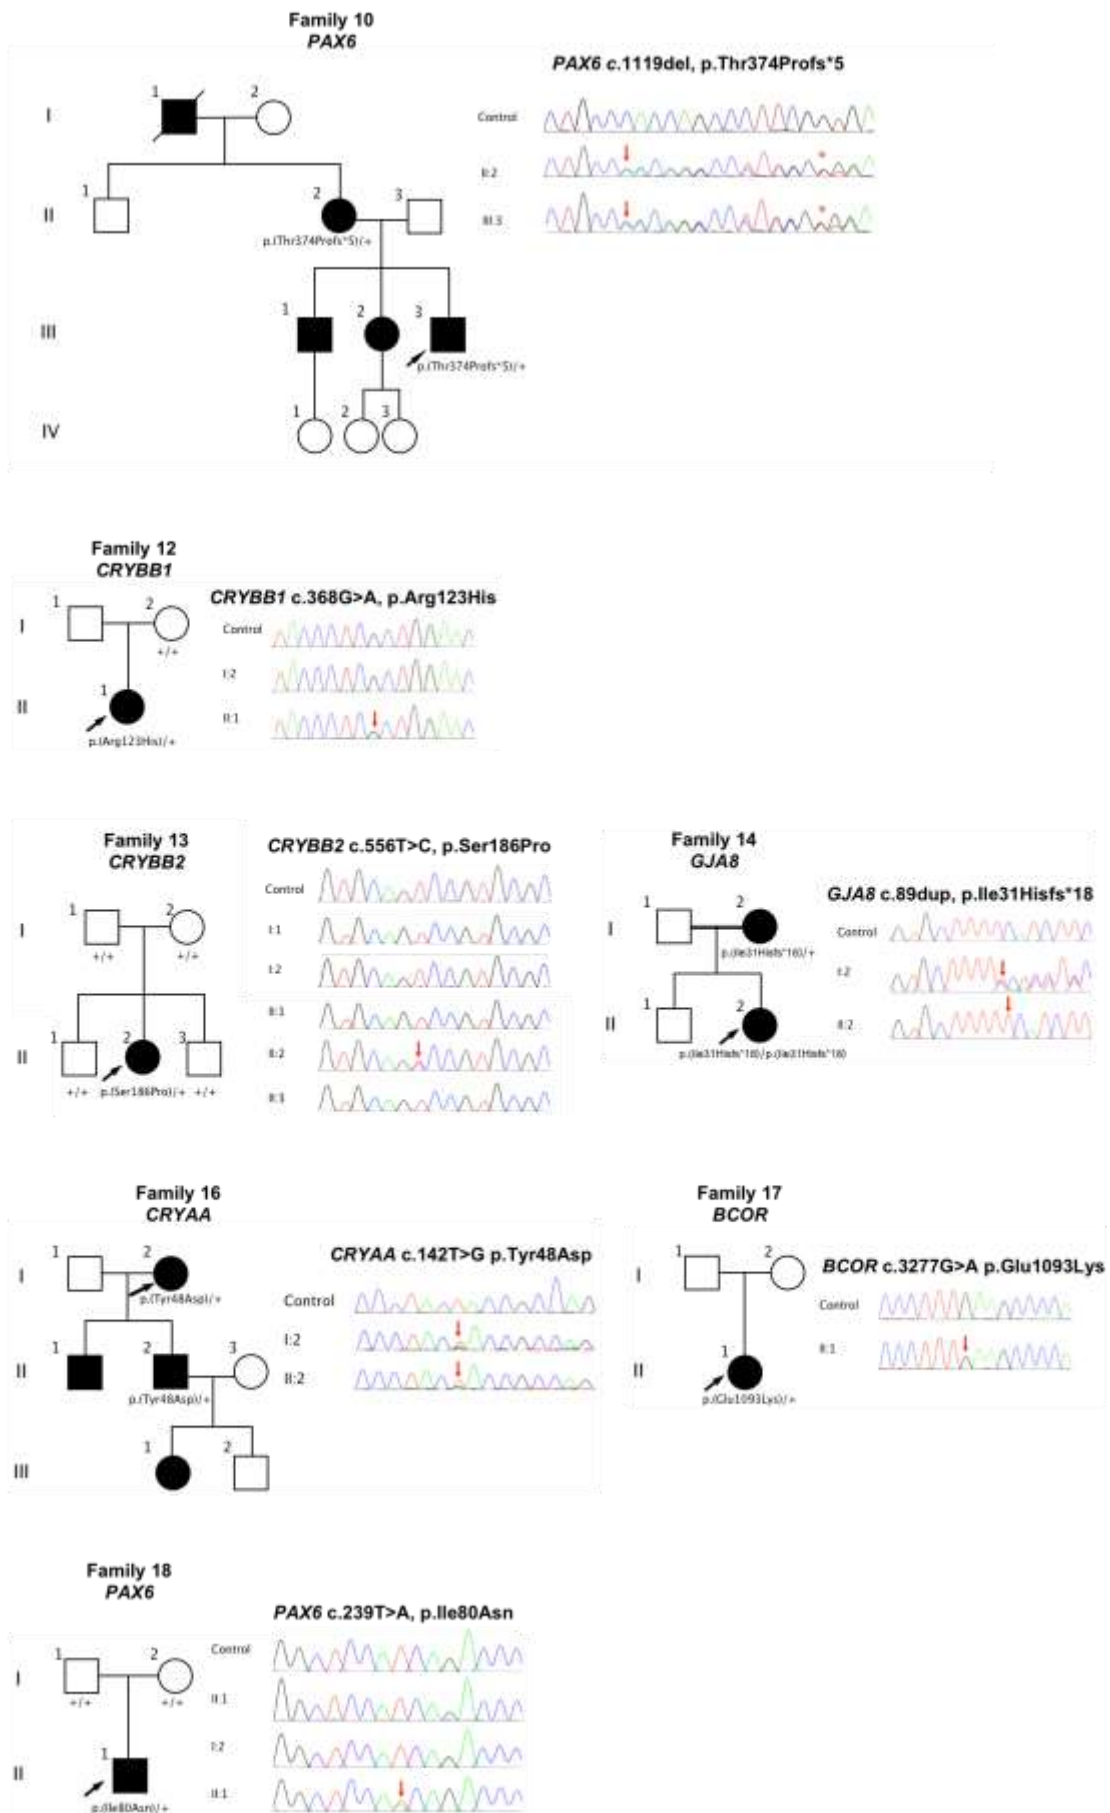

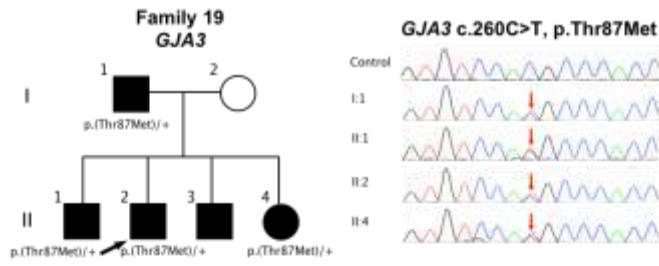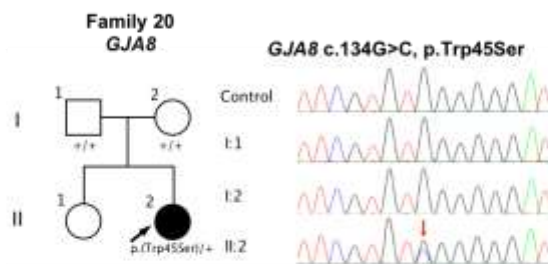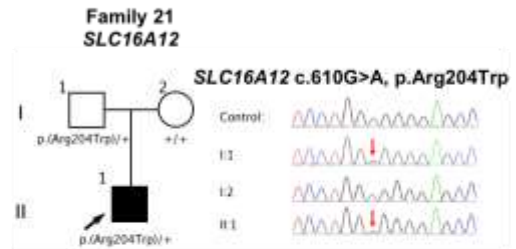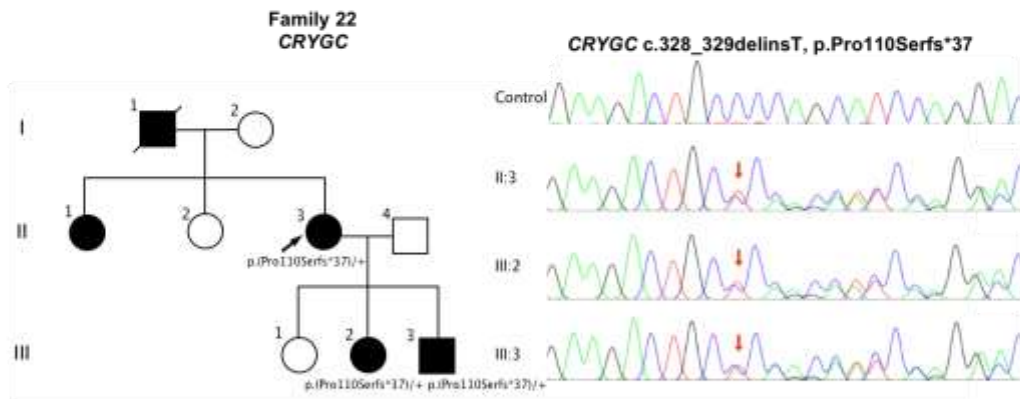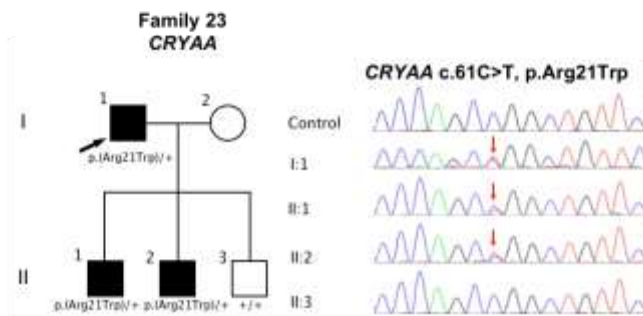

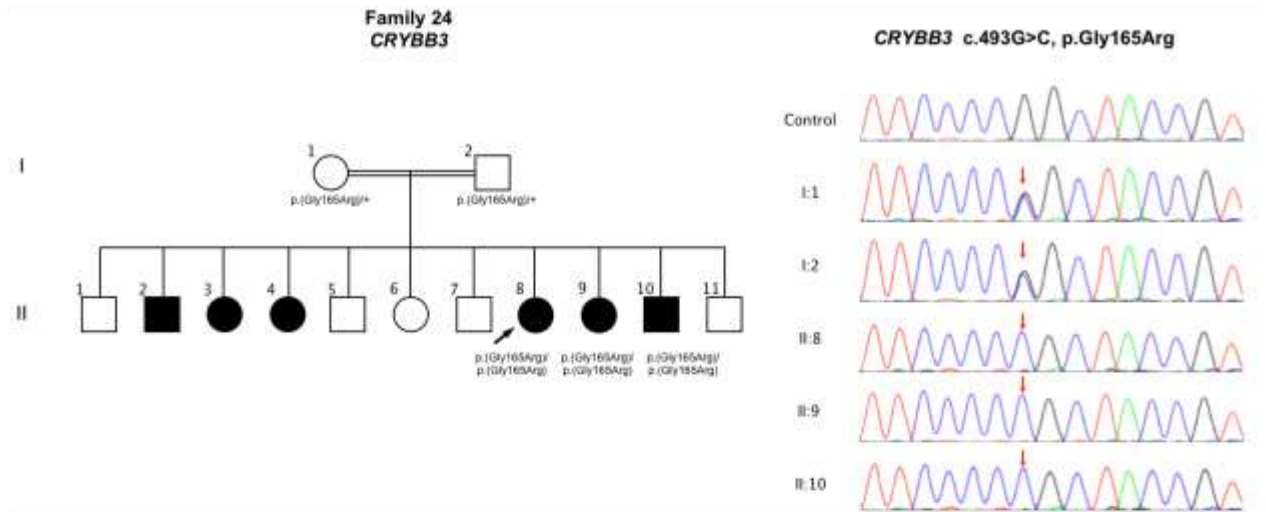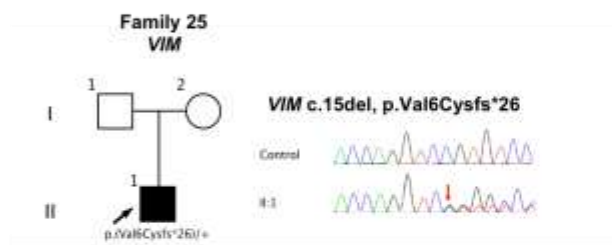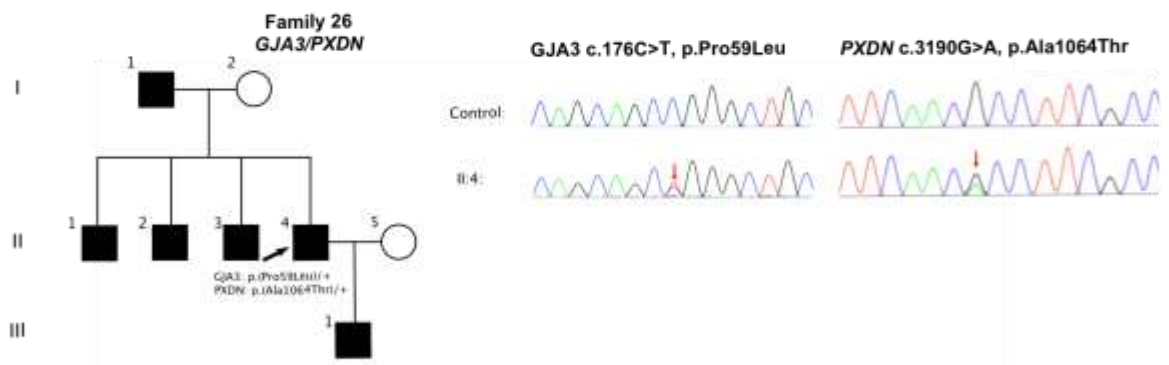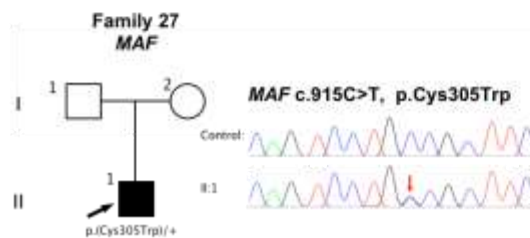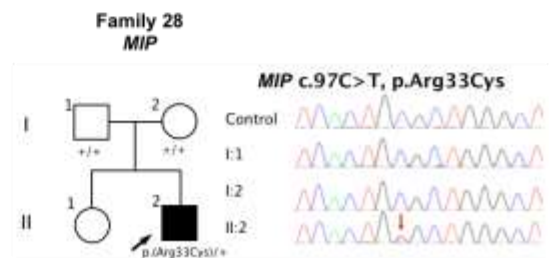



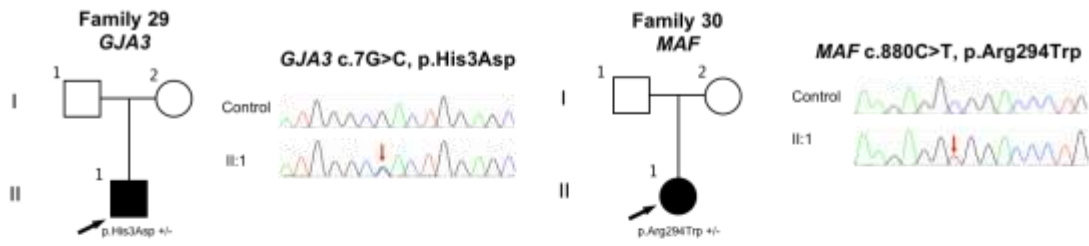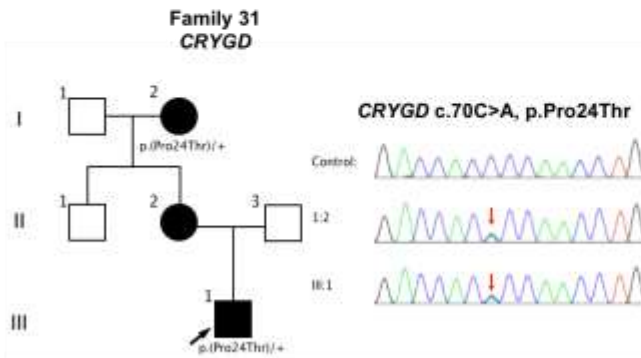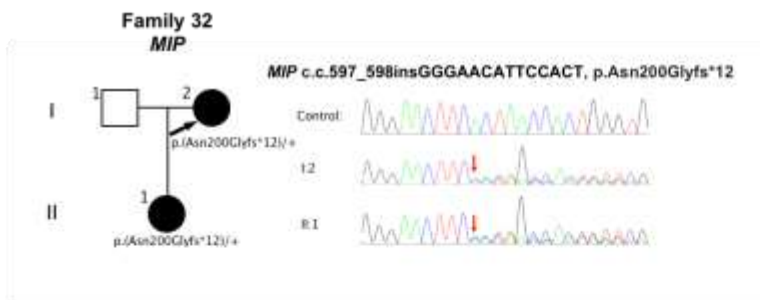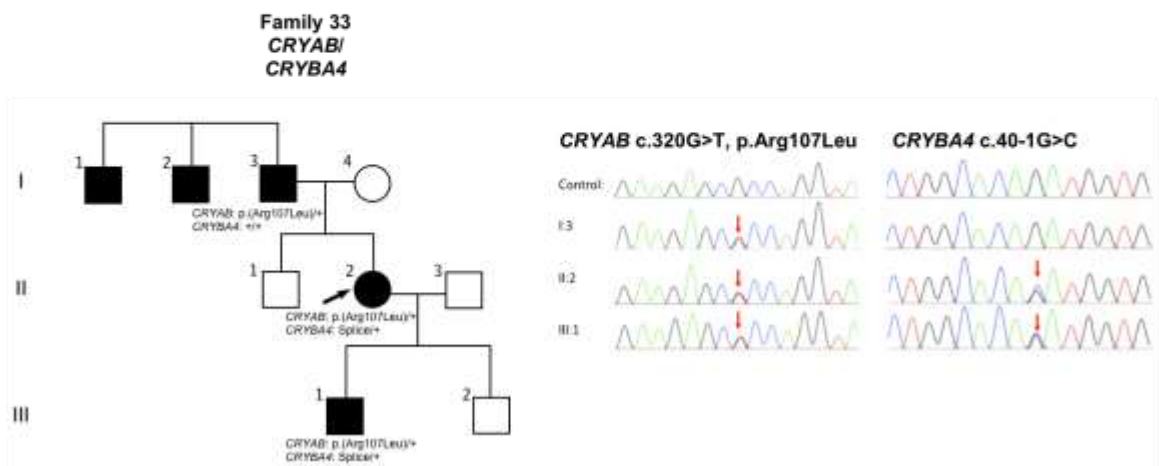

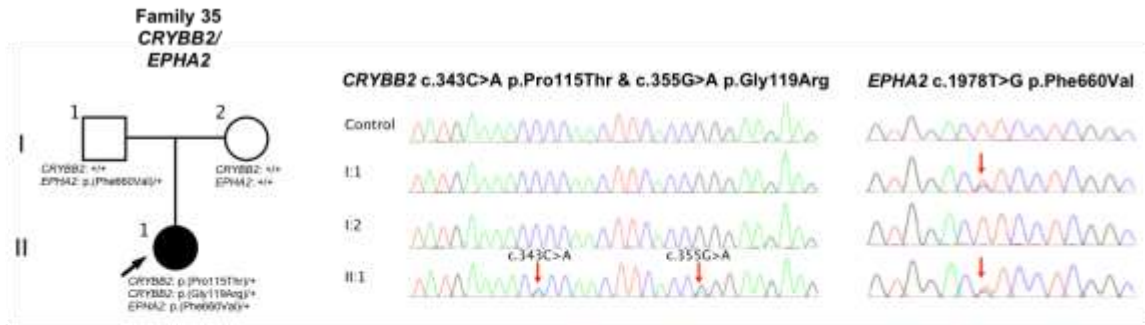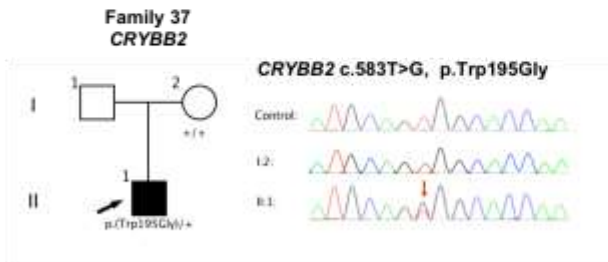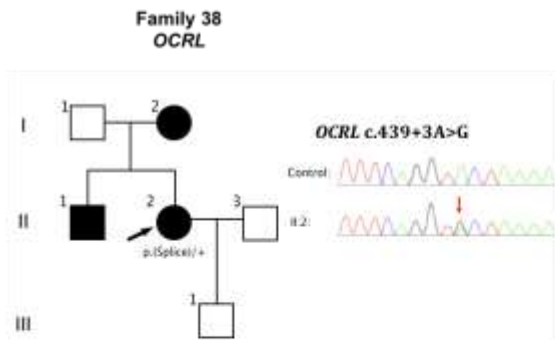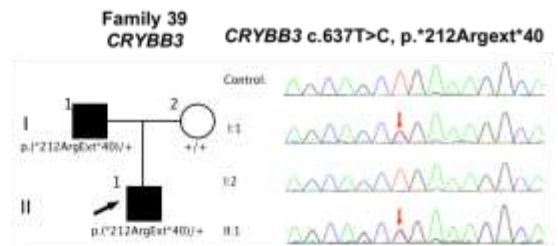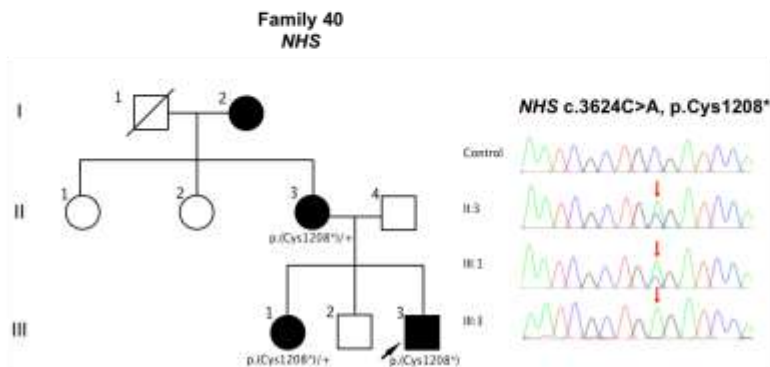

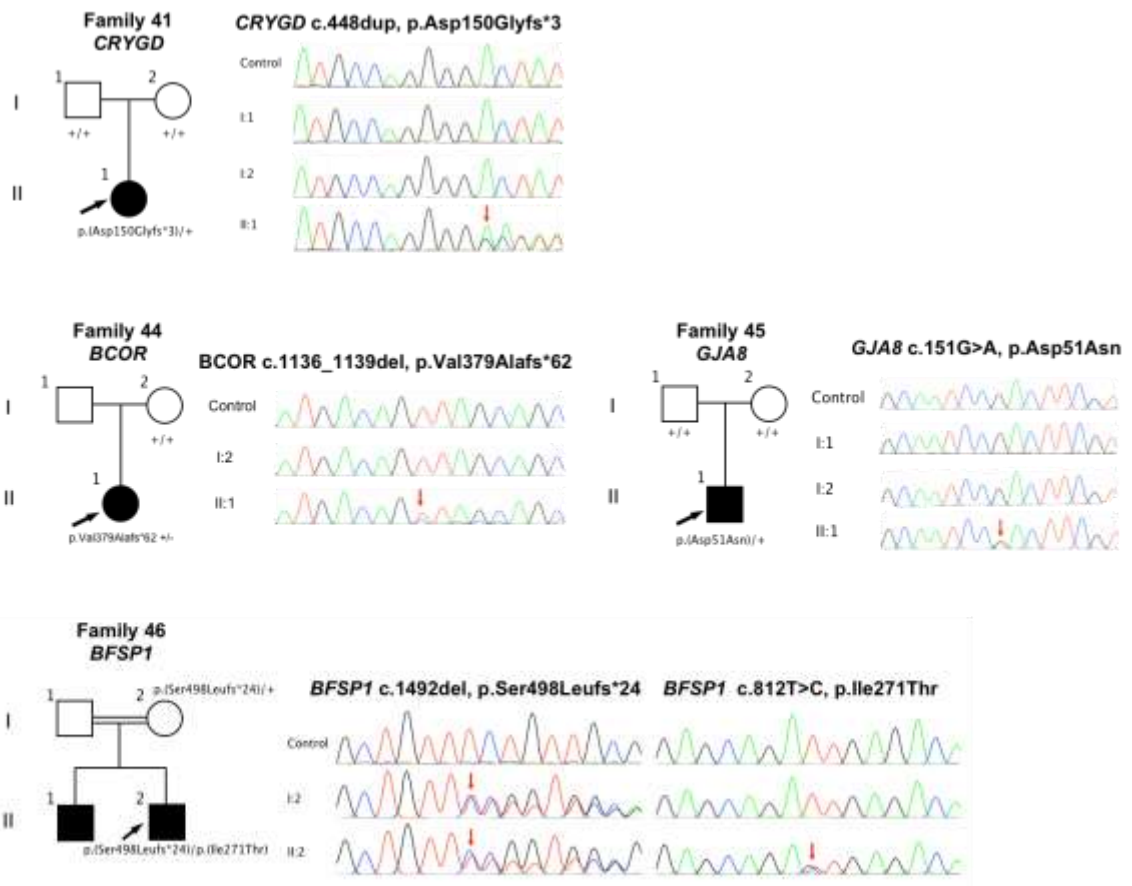

**Supp. Table S1. Clinical features in 46 families with sporadic and familial cataracts**

| Family (Proband) | Cataract description                                  | Procedures, age                                                                              | HCD                    | AXL                       | Additional features                                                                                                                                                                                                                                                      | Family Information                                                                                                                                                                                                                                                                             |
|------------------|-------------------------------------------------------|----------------------------------------------------------------------------------------------|------------------------|---------------------------|--------------------------------------------------------------------------------------------------------------------------------------------------------------------------------------------------------------------------------------------------------------------------|------------------------------------------------------------------------------------------------------------------------------------------------------------------------------------------------------------------------------------------------------------------------------------------------|
| 1 (II:1) F       | BL                                                    | Baerveldt tube 30yo, cyclodiode photoablation 20yo                                           | L10<br>R10<br>35yo     | L 28.2, R 27.28<br>35yo   | Aphakic glaucoma<br>Retinal detachment 30yo                                                                                                                                                                                                                              | Sister less severely affected BL cataracts. Mother sutural cataract. Father unaffected.                                                                                                                                                                                                        |
| 2 (II:1) S       | BL dense with anterior polar component                | Lensectomy 2 weeks, left Baerveldt tube 18mo inserted                                        | L9 R9<br>birth         | L18.4 R 18.55<br>birth    | Aphakic glaucoma, nystagmus VA R 6/30<br>L 6/60                                                                                                                                                                                                                          | Parents unaffected                                                                                                                                                                                                                                                                             |
| 3 (III:1) F      | BL rudimentary lens on ultrasound                     | Lensectomies 5yo                                                                             | L9.5 R9<br>9yo         | L 24.8 R 25.6<br>9yo      | BL sclerocornea, nystagmus VA 2/60                                                                                                                                                                                                                                       | Sister BL cataracts, Mother BL cataracts, Father unaffected                                                                                                                                                                                                                                    |
| 4 (II:5) F       | BL                                                    | Bilateral needlings Age 5                                                                    | L10<br>R10             | L 27.21 R 27.66<br>Age 65 | microcornea                                                                                                                                                                                                                                                              | 4 affected of 5 siblings. Father and nephew also affected                                                                                                                                                                                                                                      |
| 5 (I:2) F        | BL nuclear                                            | Lensectomy 2yo                                                                               | L11<br>R11<br>38yo     | N/K                       | VA L2/60 R3/60                                                                                                                                                                                                                                                           | 2 daughters have congenital nuclear cataracts/microphthalmia and microcornea HCD 10.5mm                                                                                                                                                                                                        |
| 6 (II:1) F       | BL dense central nuclear                              | BL lensectomy 3mo, YAG capsulotomy 7mo BL Baerveldt tube 2.5yo                               | 10mm<br>BL<br>1yo      | 17mm<br>BL<br>1yo         | Intellectual disability, large teeth, dysmorphic facies                                                                                                                                                                                                                  | Brother HCD 11.25 AXL 20.88, aphakic glaucoma, Baerveldt tube 3yo, Father cerulean cataracts HCD 12 AXL 24.5. Mother unaffected                                                                                                                                                                |
| 7 (II:3) S       | R Microphthalmia and BL cataracts                     | Bilateral Lensectomies Age 15, Right Molteno implant                                         | L 9 R 11.5             | L 23.65 R 19.58<br>Age 47 | nil                                                                                                                                                                                                                                                                      | Parents unaffected                                                                                                                                                                                                                                                                             |
| 8 (I:2) F        | BL nuclear                                            | BL lensectomy 2yo, L eye glaucoma and enucleation                                            | N/K                    | N/K                       | nil                                                                                                                                                                                                                                                                      | BL cataracts in affected children                                                                                                                                                                                                                                                              |
| 9 (II:1) S       | BL microphthalmia and total cataracts                 | R lensectomy age 11                                                                          | 7.5 BL,<br>12yo        | L23, R24<br>12yo          | nil                                                                                                                                                                                                                                                                      | Parents unaffected, Consanguineous family                                                                                                                                                                                                                                                      |
| 10 (III:3) F     | Right small central anterior capsular                 | BL Ptosis surgery                                                                            | R11.4<br>L11.9<br>25yo | 22.57R<br>22.62L<br>25yo  | VA R6/12 L6/12, nystagmus, limbal stem cell failure, OCT shows loss of foveal pit, ectropion uvea, fine rotatory nystagmus, Mother VA R 6/36+1, L NPL, cataracts, glaucoma, limbal stem cell failure, OCT shows loss of foveal pit, ectropion uvea, AXL R21.96 HCD R12.7 | Sister VA R6/24 L6/12, anterior polar cataracts, limbal stem cell failure, OCT shows loss of foveal pit, ectropion uvea, fine rotatory nystagmus, Mother VA R 6/36+1, L NPL, cataracts, glaucoma, limbal stem cell failure, OCT shows loss of foveal pit, ectropion uvea, AXL R21.96 HCD R12.7 |
| 11 (II:1) F      | BL nuclear                                            | Lensectomy R, 1 month; & L, 4 years                                                          | L9.5,<br>R10,<br>1mth  | L17.49<br>R17.02<br>1mth  | nil                                                                                                                                                                                                                                                                      | Father also affected                                                                                                                                                                                                                                                                           |
| 12 (II:1) S      | BL posterior subcapsular                              | BL lensectomy 4yo, IOL implants 9yo                                                          | L10<br>R10<br>4yo      | L17.8,<br>R17.<br>9 4yo   | VA R6/12, L6/19, 12yo                                                                                                                                                                                                                                                    | Both parents unaffected                                                                                                                                                                                                                                                                        |
| 13 (II:1) S      | BL                                                    | BL lensectomy 3mo, intraocular lens 11yo                                                     | N/K                    | N/K                       | NK                                                                                                                                                                                                                                                                       | Both parents unaffected                                                                                                                                                                                                                                                                        |
| 14 (II:2) F      | BL                                                    | BL lensectomy 6 mo, glaucoma filtration and 5FU 18yo, Molteno implant 19yo                   | 9.5 BL<br>24yo         | 23.5 BL<br>24yo           | Severe glaucoma, 17yo, VA R6/15 L unobtainable                                                                                                                                                                                                                           | Unaffected sibling, Mother has nuclear dot cataracts and early L posterior subcapsular cataract, HCD 10.5mm.                                                                                                                                                                                   |
| 15 (II:1) S      | BL                                                    | N/K                                                                                          | 9 BL<br>45yo           | L25.2 R<br>23.7 45yo      | VA 6/60 BL 45yo                                                                                                                                                                                                                                                          | N/K                                                                                                                                                                                                                                                                                            |
| 16 (I:2) F       | BL posterior cortical and diffuse fine dot opacities  | radial keratotomy 38yo                                                                       | N/K                    | N/K                       | glaucoma, VA R6/6,<br>L6/15                                                                                                                                                                                                                                              | Granddaughter posterior cortical and fine dot cataracts at 5yo, VA R6/18 L6/36, Son zonular/pulverulent cataracts with central dot opacity at 12yo, VA 6/7.5 7/7                                                                                                                               |
| 17 (II:1) S      | BL                                                    | BL IOL 5mo                                                                                   | N/K                    | N/K                       | L retinal detachment 7yo                                                                                                                                                                                                                                                 | Both parents unaffected                                                                                                                                                                                                                                                                        |
| 18 (II:1) S      | BL anterior polar with nuclear component              | Lensectomy/IOL 6mo, L medial rectus resection & L lateral rectus recession for exotropia 8yo | 10 BL<br>6mo           | 17.2 BL<br>6mo            | nystagmus, VA 6/24<br>BL                                                                                                                                                                                                                                                 | Both parents unaffected                                                                                                                                                                                                                                                                        |
| 19 (II:2) F      | BL lamellar with anterior/posterior sutural component | N/K                                                                                          | N/K                    | N/K                       | nil                                                                                                                                                                                                                                                                      | Father, paternal uncle, grandfather, siblings also affected. Pulverulent in father. Siblings faint/mild cataracts only.                                                                                                                                                                        |

| Family (Proband) | Cataract description                                      | Procedures, age                                                       | HCD                      | AXL                      | Additional features                                                                                                                                 | Family Information                                                                                                                                         |
|------------------|-----------------------------------------------------------|-----------------------------------------------------------------------|--------------------------|--------------------------|-----------------------------------------------------------------------------------------------------------------------------------------------------|------------------------------------------------------------------------------------------------------------------------------------------------------------|
| 20 (II:2) S      | BL anterior cortical/nuclear                              | BL lensectomy 2 mo                                                    | 9 BL 3yo                 | R 15 L 15.2 2 mo         | VA 6mo R6/280 L6/120 latent nystagmus                                                                                                               | Both parents unaffected                                                                                                                                    |
| 21 (II:1) S      | BL lamellar with posterior subcapsular component          | BL lensectomy and IOL implant 5yo                                     | N/K                      | N/K                      | learning difficulties                                                                                                                               | Both parents unaffected                                                                                                                                    |
| 22 (II:3) F      | BL lamellar                                               | BL cataract surgery age 35                                            | N/K                      | N/K                      | nil                                                                                                                                                 | Two children affected with lamellar cataracts. Father and sister also affected                                                                             |
| 23 (I:1) F       | BL                                                        | BL lensectomy 18mo                                                    | N/K                      | N/K                      | Glaucoma, severe visual loss                                                                                                                        | BL cataracts in two sons                                                                                                                                   |
| 24 (II:8) F      | BL central dense nuclear with extension to anterior polar | BL Lensectomy                                                         | 10mm BL                  | N/K                      | Nystagmus, microphthalmia, VA 2/60 BL 17yo                                                                                                          | 6/11 children affected, both parents unaffected.                                                                                                           |
| 25 (II:1) S      | BL                                                        | BL lensectomy 1yo                                                     | 11.25 BL 1yo             | N/K                      | VA 6/36 BL 1yo                                                                                                                                      | Both parents unaffected                                                                                                                                    |
| 26 (II:4) F      | BL lamellar                                               | L lensectomy age 15                                                   | N/K                      | N/K                      | nil                                                                                                                                                 | Father, 3 siblings & son affected                                                                                                                          |
| 27 (II:1) S      | BL                                                        | BL lensectomy 6mo R Baerveldt implant 5yo                             | 11.5 BL 5yo              | N/K                      | aphakic glaucoma, corneal ulcers 3yo, VA R6/60 L6/24 5yo                                                                                            | Both Parents unaffected                                                                                                                                    |
| 28 (II:2) S      | BL dense central nuclear                                  | lensectomies 1mo                                                      | N/K                      | N/K                      | N/K                                                                                                                                                 | Both parents unaffected                                                                                                                                    |
| 29 (II:1) S      | BL nuclear pulverulent                                    | R lens aspiration 17yo L 19yo, R capsulotomy 19yo, IOL R 31yo, L 32yo | N/K                      | N/K                      | VA R6/18 L 6/45                                                                                                                                     | Both parents unaffected                                                                                                                                    |
| 30 (II:1) S      | BL                                                        | Lensectomies 4mo                                                      | 10.5 BL 4mo              | R18 L19 4mo              | VA 6/80 BL 2yo                                                                                                                                      | Both parents unaffected                                                                                                                                    |
| 31 (III:1) F     | BL Lamellar                                               | BL Lensectomies                                                       | 10.5L 10R 6mo Age 3 mths | R17.27 L17.38 Age 3 mths | Nil                                                                                                                                                 | Mother (II:2) BL cataract and glaucoma, HCD 11BL Grandmother (I:2) also glaucoma and cataracts, HCD 11BL.                                                  |
| 32 (I:2) F       | BL lamellar & pulverulent with blue dot                   | BL Phaco + PCIOL Age 65                                               | N/K                      | R 24.59, L 24.9          | Nil                                                                                                                                                 | Daughter (II:1) affected more severely requiring cataract surgery Age 31 (R) and 36 (L) yrs                                                                |
| 33 (II:2) F      | BL lens opacities with 'frosted glass' appearance         | nil                                                                   | N/K                      | N/K                      | N/K                                                                                                                                                 | Son (III:1) cataracts at 18mo, lensectomies 6yo, father (I:3) and 2 uncles also with cataracts.                                                            |
| 34 (II:1) S      | BL                                                        | N/K                                                                   | N/K                      | N/K                      | N/K                                                                                                                                                 | Both parents unaffected                                                                                                                                    |
| 35 (II:1) S      | BL                                                        | BL lensectomies 2mo                                                   | R7 L8 2yo                | R 17.23 L 17.93 2yo      | VA 6/80 BL 2yo, nystagmus                                                                                                                           | Both parents unaffected                                                                                                                                    |
| 36 (II:1) S      | BL                                                        | lensectomy 6yo, YAG capsulotomy 10yo                                  | N/K                      | N/K                      | VA R6/24 L6/15 12yo, mild learning difficulties                                                                                                     | Both parents unaffected                                                                                                                                    |
| 37 (II:1) S      | BL anterior polar                                         | L cataract extract and IOL 11yo, esotropia correction 14yo            | N/K                      | N/K                      | L amblyopia, VA R6/6 L count fingers 19yo                                                                                                           | Both parents unaffected                                                                                                                                    |
| 38 (II:2) F      | BL                                                        | Cataract needling, childhood                                          | N/K                      | N/K                      | Aphakic glaucoma, buphthalmos, scleromalacia,                                                                                                       | Mother (I:2) cataracts, brother (II:1) cataracts and nonverbal/intellectual disability, son (III:1) unaffected                                             |
| 39 (II:1) F      | BL                                                        | BL lensectomies 2mo                                                   | 10.5 BL 1yo              | N/K                      | Umbilical hernia                                                                                                                                    | Father (I:1) also cataract, glaucoma, umbilical hernia, BL iridectomies with iris cysts. VA R6/18 L6/12 40yo. HCD 11 BL, mother (I:2) unaffected           |
| 40 (III:3) F     | BL                                                        | BL cataract extraction and glaucoma surgery                           | N/K                      | N/K                      | Left foot insertional polydactyly, ADHD, Mild intellectual delay. Face: small narrow teeth with serrated edge, simple ears. VA R unobtainable L6/36 | Mother BL subcapsular cataracts diagnosed 32yo, Sister BL cataracts diagnosed 5yo, oligodontia. Grandmother cataracts diagnosed in 50s. Father unaffected. |
| 41 (II:1) S      | BL Fetal Nuclear                                          | BL Lens aspirations and PCIOL implants age 8 weeks                    | N/K                      | N/K                      | VA R 6/140, L 6/140                                                                                                                                 | Father tiny dot opacities. Brother and mother unaffected                                                                                                   |

| Family (Proband) | Cataract description | Procedures, age                                          | HCD                | AXL                  | Additional features                                                  | Family Information                                                       |
|------------------|----------------------|----------------------------------------------------------|--------------------|----------------------|----------------------------------------------------------------------|--------------------------------------------------------------------------|
| 42 (II:1) S      | BL                   | Bilateral lens aspiration and IOL implants Age 23 months | N/K                | L 22.23mm<br>R 22.42 | VA R 6/18 L 6/9                                                      | Both Parents unaffected                                                  |
| 43 (II:1) S      | BL anterior polar    | N/K                                                      | N/K                | N/K                  | N/K                                                                  | Both parents unaffected                                                  |
| 44 (II:1) S      | BL                   | Bilateral Lens aspirations 4 weeks Baerveldt implants    | N/K                | N/K                  | VA R6/35, L 6/30<br>Congenital cleft palate,<br>Atrial septal defect | Both parents unaffected                                                  |
| 45 (II:1) S      | BL                   | Right N/K Left No surgery                                | R 5mm,<br>L unmeas | R 15.82,<br>L unmeas | BL microphthalmia/<br>sclerocornea                                   | Both parents unaffected                                                  |
| 46 (II:2) F      | BL                   | BL cataract extraction 2yo                               | N/K                | N/K                  | VA R6/19<br>L6/9.5,glaucoma                                          | Brother also affected. Parents related.<br>Father N/K. Mother unaffected |

F Familial, S Sporadic, L left, R right, VA visual acuity, BL bilateral, PC Posterior chamber, IOL Intraocular Lens, Phaco phacoemulsification, HCD Horizontal Corneal Diameter in mm and age of measurement, AXL Axial Length in mm and age of measurement, BL Bilateral, N/K Not known, unmeas Unmeasurable.

**Supp. Table S2. List of 32 Cataract Genes**

| Group                 | Gene            | OMIM number | Inheritance | Chromosome, Gene coordinates (HG19) | Reference Sequence |
|-----------------------|-----------------|-------------|-------------|-------------------------------------|--------------------|
| Crystallins           | <i>CRYAA</i>    | 123580      | AD or AR    | 21:44589118-44592915                | NM_000394.3        |
|                       | <i>CRYAB</i>    | 123590      | AD or AR    | 11:111779289-111794446              | NM_001885.2        |
|                       | <i>CRYBA1</i>   | 600929      | AD          | 22:26995242-27014052                | NM_005208.4        |
|                       | <i>CRYBA4</i>   | 123630      | AD          | 22:25595817-25603330                | NM_001886.2        |
|                       | <i>CRYBB1</i>   | 123610      | AD or AR    | 17:27573881-27581512                | NM_001887.3        |
|                       | <i>CRYBB2</i>   | 600836      | AD          | 2:219854911-219858143               | NM_000496.2        |
|                       | <i>CRYBB3</i>   | 123631      | AR          | 22:27017928-27026636                | NM_004076.4        |
|                       | <i>CRYGC</i>    | 123680      | AD          | 2:208992861-208994554               | NM_020989.3        |
|                       | <i>CRYGD</i>    | 123690      | AD          | 2:208986331-208989225               | NM_006891.3        |
|                       | <i>CRYGS</i>    | 123730      | AD          | 3:186256230-186264491               | NM_017541.2        |
| Gap Junction          | <i>GJA3</i>     | 121015      | AD          | 13:20712394-20735188                | NM_021954.3        |
|                       | <i>GJA8</i>     | 600897      | AD or AR    | 1:147374946-147381393               | NM_005267.4        |
| Intermediate Filament | <i>BFSP1</i>    | 603307      | AR          | 20:17474550-17549865                | NM_001195.4        |
|                       | <i>BFSP2</i>    | 603212      | AD          | 3:133118839-133194066               | NM_003571.3        |
|                       | <i>VIM</i>      | 193060      | AD          | 10:17270258-17279592                | NM_003380.3        |
| Lens Membrane         | <i>MIP</i>      | 154050      | AD          | 12:56843286-56862950                | NM_012064.3        |
|                       | <i>LIM2</i>     | 154045      | AR          | 19:51883163-51891214                | NM_001161748.1     |
|                       | <i>SLC16A12</i> | 611910      | AD          | 10:91190051-91316398                | NM_213606.3        |
| Transcription Factors | <i>PAX6</i>     | 607108      | AD          | 11:31806340-31839509                | NM_0001604.4       |
|                       | <i>MAF</i>      | 177075      | AD          | 16:79619740-79634611                | NM_001031804.2     |
|                       | <i>HSF4</i>     | 602438      | AD or AR    | 16:67197288-67203848                | NM_001538.3        |
|                       | <i>FOXE3</i>    | 601094      | AD          | 1:47881744-47883723                 | NM_012186.2        |
|                       | <i>EYA1</i>     | 601653      | AD          | 8:72109668-72274467                 | NM_000503.5        |
|                       | <i>PITX3</i>    | 602669      | AD          | 10:103989943-104001231              | NM_005029.3        |
| Syndromal Genes       | <i>NHS</i>      | 300457      | X           | X:17393543-17754114                 | NM_198270.3        |
|                       | <i>OCRL</i>     | 300535      | X           | X:128673826-128726538               | NM_001587.3        |
|                       | <i>BCOR</i>     | 300485      | X           | X:39909068-40036582                 | NM_001123385.1     |
|                       | <i>FTL</i>      | 134790      | AD          | 19:49468558-49470135                | NM_000146.3        |
|                       | <i>GALK1</i>    | 604313      | AR          | 17:73747675-73761792                | NM_000154.1        |
| Other lens proteins   | <i>GCNT2</i>    | 600429      | AR          | 6:10492456-10629601                 | NM_145655.3        |
|                       | <i>EPHA2</i>    | 176946      | AD or AR    | 1:16450832-16482582                 | NM_004431.3        |
|                       | <i>PXDN</i>     | 605158      | AR          | 2:1635659-1748624                   | NM_012293.2        |

**Supp. Table S3A. TruSeq/MiSeq analysis and variant prioritization**

| Patient        | Aligned Reads  | Average Coverage | % over 15X coverage | Unique exonic/splice SNP/indels in 32 cataract genes | synonymous variants | Minor Allele Freq >1% | lacking conservation and predicted pathogenicity | variants of interest |
|----------------|----------------|------------------|---------------------|------------------------------------------------------|---------------------|-----------------------|--------------------------------------------------|----------------------|
| 1              | 1947019        | 1577             | 93%                 | 3                                                    | 2                   | 0                     | 0                                                | 1                    |
| 2              | 1926038        | 1566             | 93%                 | 4                                                    | 2                   | 1                     | 0                                                | 1                    |
| 3              | 1791030        | 1448             | 93%                 | 2                                                    | 0                   | 0                     | 1                                                | 1                    |
| 4              | 1590658        | 1149             | 92%                 | 0                                                    | 0                   | 0                     | 0                                                | 0                    |
| 5              | 1635604        | 1334             | 92%                 | 1                                                    | 0                   | 1                     | 0                                                | 0                    |
| 6              | 1642793        | 1332             | 93%                 | 5                                                    | 1                   | 1                     | 2                                                | 1                    |
| 7              | 1672787        | 1352             | 93%                 | 1                                                    | 1                   | 0                     | 0                                                | 0                    |
| 8              | 1354442        | 1114             | 93%                 | 1                                                    | 0                   | 0                     | 0                                                | 1                    |
| 9              | 2029840        | 1675             | 93%                 | 0                                                    | 0                   | 0                     | 0                                                | 0                    |
| 10             | 2035779        | 1672             | 93%                 | 2                                                    | 0                   | 0                     | 1                                                | 1                    |
| 11             | 1890361        | 1539             | 93%                 | 0                                                    | 0                   | 0                     | 0                                                | 0                    |
| 12             | 1793437        | 1455             | 93%                 | 1                                                    | 0                   | 0                     | 0                                                | 1                    |
| 13             | 1663335        | 1341             | 93%                 | 1                                                    | 0                   | 0                     | 0                                                | 1                    |
| 14             | 1874139        | 1517             | 94%                 | 2                                                    | 1                   | 0                     | 0                                                | 1                    |
| 15             | 1670009        | 1340             | 93%                 | 0                                                    | 0                   | 0                     | 0                                                | 0                    |
| 16             | 669456         | 461              | 89%                 | 1                                                    | 0                   | 0                     | 0                                                | 1                    |
| 17             | 1563096        | 1068             | 91%                 | 1                                                    | 0                   | 0                     | 0                                                | 1                    |
| 18             | 802168         | 549              | 91%                 | 2                                                    | 0                   | 1                     | 0                                                | 1                    |
| 19             | 925550         | 635              | 91%                 | 1                                                    | 0                   | 0                     | 1                                                | 0                    |
| 20             | 1007310        | 690              | 91%                 | 2                                                    | 1                   | 0                     | 0                                                | 1                    |
| 21             | 856906         | 587              | 90%                 | 3                                                    | 0                   | 0                     | 2                                                | 1                    |
| 22             | 667598         | 457              | 90%                 | 2                                                    | 0                   | 0                     | 1                                                | 1                    |
| 23             | 1004618        | 689              | 91%                 | 1                                                    | 0                   | 0                     | 0                                                | 1                    |
| 24             | 972188         | 668              | 90%                 | 2                                                    | 0                   | 0                     | 1                                                | 1                    |
| 25             | 1043798        | 711              | 90%                 | 1                                                    | 0                   | 0                     | 0                                                | 1                    |
| 26             | 891564         | 613              | 91%                 | 1                                                    | 0                   | 0                     | 0                                                | 1                    |
| 27             | 941480         | 649              | 90%                 | 1                                                    | 0                   | 0                     | 0                                                | 1                    |
| 28             | 1048322        | 719              | 91%                 | 2                                                    | 0                   | 1                     | 0                                                | 1                    |
| 29             | 899930         | 615              | 90%                 | 0                                                    | 0                   | 0                     | 0                                                | 0                    |
| 30             | 736712         | 504              | 90%                 | 0                                                    | 0                   | 0                     | 0                                                | 0                    |
| 31             | 973224         | 667              | 91%                 | 2                                                    | 0                   | 0                     | 1                                                | 1                    |
| 32             | 972896         | 670              | 90%                 | 2                                                    | 0                   | 0                     | 1                                                | 1                    |
| 33             | 1015392        | 694              | 91%                 | 2                                                    | 0                   | 0                     | 0                                                | 2                    |
| 34             | 674422         | 460              | 88%                 | 1                                                    | 0                   | 0                     | 1                                                | 0                    |
| 35             | 795834         | 546              | 89%                 | 3                                                    | 0                   | 0                     | 0                                                | 3                    |
| 36             | 913398         | 625              | 90%                 | 0                                                    | 0                   | 0                     | 0                                                | 0                    |
| 37             | 879880         | 602              | 91%                 | 2                                                    | 1                   | 0                     | 0                                                | 1                    |
| 38             | 646364         | 444              | 88%                 | 2                                                    | 1                   | 0                     | 0                                                | 1                    |
| <b>AVERAGE</b> | <b>1247878</b> | <b>940</b>       | <b>91%</b>          |                                                      |                     |                       |                                                  |                      |



**Supp. Table S3B. TruSight/HiSeq analysis and variant prioritization**

| Patient                     | Aligned Reads   | Average Coverage | % over 15X coverage | Unique exonic/splice SNP/indels in 32 cataract genes | synonymous variants | Minor Allele Freq >1% | lacking conservation and predicted pathogenicity | variants of interest |
|-----------------------------|-----------------|------------------|---------------------|------------------------------------------------------|---------------------|-----------------------|--------------------------------------------------|----------------------|
| 1                           | 31502748        | 182              | 96%                 | 2                                                    | 0                   | 0                     | 2                                                | 0                    |
| 3                           | 26431942        | 164              | 97%                 | 2                                                    | 0                   | 0                     | 2                                                | 0                    |
| 4                           | 29134056        | 176              | 96%                 | 0                                                    | 0                   | 0                     | 0                                                | 0                    |
| 5                           | 30545758        | 208              | 97%                 | 0                                                    | 0                   | 0                     | 0                                                | 0                    |
| 7                           | 27837362        | 189              | 96%                 | 3                                                    | 1                   | 1                     | 0                                                | 1                    |
| 9                           | 26920610        | 182              | 96%                 | 0                                                    | 0                   | 0                     | 0                                                | 0                    |
| 11                          | 30663605        | 174              | 96%                 | 3                                                    | 2                   | 1                     | 0                                                | 0                    |
| 15                          | 27067675        | 153              | 96%                 | 0                                                    | 0                   | 0                     | 0                                                | 0                    |
| 17                          | 25494231        | 166              | 98%                 | 2                                                    | 1                   | 0                     | 0                                                | 1                    |
| 19                          | 20113028        | 113              | 94%                 | 2                                                    | 0                   | 0                     | 1                                                | 1                    |
| 21                          | 21039863        | 143              | 94%                 | 3                                                    | 0                   | 2                     | 0                                                | 1                    |
| 26                          | 8859470         | 59               | 86%                 | 3                                                    | 1                   | 0                     | 0                                                | 2                    |
| 29                          | 31191722        | 174              | 97%                 | 0                                                    | 0                   | 0                     | 0                                                | 0                    |
| 30                          | 23699532        | 157              | 95%                 | 2                                                    | 1                   | 0                     | 0                                                | 1                    |
| 34                          | 25213994        | 172              | 95%                 | 0                                                    | 0                   | 0                     | 0                                                | 0                    |
| 36                          | 22807249        | 126              | 92%                 | 1                                                    | 0                   | 1                     | 0                                                | 0                    |
| 38                          | 33088503        | 222              | 97%                 | 1                                                    | 0                   | 0                     | 0                                                | 1                    |
| <b>39</b>                   | <b>10312019</b> | <b>106</b>       | <b>93%</b>          | <b>1</b>                                             | <b>0</b>            | <b>0</b>              | <b>0</b>                                         | <b>1</b>             |
| <b>40</b>                   | <b>1343330</b>  | <b>16</b>        | <b>38%</b>          | <b>17</b>                                            | <b>12</b>           | <b>2</b>              | <b>2</b>                                         | <b>1</b>             |
| <b>Father from family 6</b> | <b>23457813</b> | <b>313</b>       | <b>97%</b>          | <b>6</b>                                             | <b>3</b>            | <b>1</b>              | <b>1</b>                                         | <b>1</b>             |
| 41                          | 21709480        | 142              | 94%                 | 1                                                    | 0                   | 0                     | 0                                                | 1                    |
| 42                          | 22436003        | 145              | 93%                 | 1                                                    | 0                   | 0                     | 0                                                | 1                    |
| 43                          | 17611667        | 116              | 92%                 | 0                                                    | 0                   | 0                     | 0                                                | 0                    |
| 44                          | 26013957        | 171              | 96%                 | 1                                                    | 0                   | 0                     | 0                                                | 1                    |
| 45                          | 24685912        | 145              | 97%                 | 3                                                    | 2                   | 0                     | 0                                                | 1                    |
| 46                          | 34487134        | 196              | 99%                 | 5                                                    | 2                   | 0                     | 1                                                | 2                    |
| <b>AVERAGE</b>              | <b>25589370</b> | <b>160</b>       | <b>95%</b>          |                                                      |                     |                       |                                                  |                      |

Note: Patients 39, 40 and the father from family 6 (in bold) had TruSight Clinical Exome and are not calculated into averages in final column. All the other patients were sequenced on TruSight One Clinical Exome.

**Supp. Table S3C. Gaps on TruSeq**

| <b>Chromosome</b> | <b>Start</b> | <b>End</b> | <b>Gene</b>   |
|-------------------|--------------|------------|---------------|
| 16                | 79633011     | 79633948   | <i>MAF</i>    |
| 1                 | 47882391     | 47882960   | <i>FOXE3</i>  |
| 10                | 103990597    | 103991136  | <i>PITX3</i>  |
| 13                | 20717103     | 20717481   | <i>GJA3</i>   |
| X                 | 17393953     | 17394305   | <i>NHS</i>    |
| 10                | 103990081    | 103990420  | <i>PITX3</i>  |
| 1                 | 47881879     | 47882210   | <i>FOXE3</i>  |
| 20                | 17511736     | 17511932   | <i>BFSP1</i>  |
| 1                 | 147380277    | 147380459  | <i>GJA8</i>   |
| 16                | 67199753     | 67199934   | <i>HSF4</i>   |
| 1                 | 47883139     | 47883317   | <i>FOXE3</i>  |
| 10                | 103991673    | 103991851  | <i>PITX3</i>  |
| 10                | 17271512     | 17271681   | <i>VIM</i>    |
| 13                | 20716393     | 20716558   | <i>GJA3</i>   |
| X                 | 39923091     | 39923254   | <i>BCOR</i>   |
| 3                 | 133167379    | 133167538  | <i>BFSP2</i>  |
| X                 | 39923617     | 39923775   | <i>BCOR</i>   |
| 4                 | 111553900    | 111554057  | <i>PITX2</i>  |
| 22                | 25599774     | 25599911   | <i>CRYBB3</i> |
| 16                | 67202916     | 67203053   | <i>HSF4</i>   |
| 20                | 17489564     | 17489690   | <i>BFSP1</i>  |
| 22                | 25601383     | 25601499   | <i>CRYBB3</i> |
| X                 | 39921414     | 39921527   | <i>BCOR</i>   |
| 2                 | 1664603      | 1664692    | <i>PXDN</i>   |
| 1                 | 16464197     | 16464281   | <i>EPHA2</i>  |
| X                 | 128696310    | 128696381  | <i>OCRL</i>   |
| 11                | 31824201     | 31824269   | <i>PAX6</i>   |
| 2                 | 1747978      | 1748040    | <i>PXDN</i>   |
| 1                 | 16458100     | 16458154   | <i>EPHA2</i>  |
| 10                | 17276500     | 17276552   | <i>VIM</i>    |
| X                 | 128674461    | 128674504  | <i>OCRL</i>   |
| 16                | 67203272     | 67203300   | <i>HSF4</i>   |
| X                 | 128674670    | 128674677  | <i>OCRL</i>   |

Table denotes gaps with <15X coverage on TruSeq, sequenced on Miseq. Arranged by size in descending order.

**Supp. Table S3D. Gaps on TruSight**

| Chromosome | Start    | End      | Gene         |
|------------|----------|----------|--------------|
| 16         | 79633062 | 79633367 | <i>MAF</i>   |
| 6          | 10557377 | 10557577 | <i>GCNT2</i> |
| 1          | 16474871 | 16474947 | <i>EPHA2</i> |
| X          | 39934379 | 39934435 | <i>BCOR</i>  |
| 13         | 20717381 | 20717429 | <i>GJA3</i>  |
| 1          | 47882097 | 47882136 | <i>FOXE3</i> |
| 1          | 47881986 | 47882014 | <i>FOXE3</i> |
| 2          | 1677413  | 1677427  | <i>PXDN</i>  |
| X          | 39921997 | 39922008 | <i>BCOR</i>  |
| 17         | 73761211 | 73761219 | <i>GALK1</i> |

Table denotes gaps with <15X coverage on TruSight library, sequenced on HiSeq. Arranged by size in descending order. The gaps in *MAF* and *GJA3* were subsequently covered with Sanger sequencing.

**Supp. Table S4. Families with likely non-causative variants**

| Family (Proband) | Phenotype                                      | Gene (Refseq ID)               | Nucleotide change | Predicted Amino acid change          | ExAC Minor Allele Frequency             | PhyloP, SIFT, MutTaster, PolyPhen | Segregation, other information                                                                | Novel                   | ACMG Classification |
|------------------|------------------------------------------------|--------------------------------|-------------------|--------------------------------------|-----------------------------------------|-----------------------------------|-----------------------------------------------------------------------------------------------|-------------------------|---------------------|
| Family 1 (II:1)  | Congenital cataract, microcornea               | <i>GJA8</i><br>NM_005267.4     | c.658A>G          | p.Asn220Asp                          | rs138140155<br>0.00257<br>(312/121392)  | High, D, D, P                     | No: not present in affected sib, present in unaffected father                                 | (Hansen, et al., 2009)  | B                   |
| Family 3 (III:1) | Congenital cataract, microcornea, sclerocornea | <i>CRYAB</i><br>NM_001885.2    | c.460G>A          | p.154Gly>Ser                         | rs150516929<br>0.000766<br>(93/121406)  | Mod, T, D, B                      | No: not present in affected mother, present in unaffected father                              | (Reilich, et al., 2010) | US                  |
| Family 17 (II:1) | Congenital cataract                            | <i>BCOR</i><br>NM_001123385.1  | c.3277G>A         | p.Glu1093Lys                         | rs144736705<br>0.0002515<br>(22/87488)  | Mod, D, D, P                      | N/K: parental samples unavailable                                                             | No                      | US                  |
| Family 21 (II:1) | Congenital cataract                            | <i>SLC16A12</i><br>NM_213606.3 | c.610C>T          | p.Arg204Trp                          | (1/121240)                              | Weak, D, D, P                     | No: present in unaffected father                                                              | Yes                     | US                  |
| Family 26 (II:4) | Congenital cataract                            | <i>PXDN</i><br>NM_012293.2     | c.3190G>A         | p.Ala1064Thr                         | rs202132697<br>0.001965<br>(230/117030) | High, T, D, P                     | N/K: parental samples unavailable, mutations in this gene causative when two alleles affected | No                      | LB                  |
| Family 33 (II:2) | Congenital cataract                            | <i>CRYBA4</i><br>NM_001886.2   | c.40-1G>C         | intron 2/exon 3 splice site mutation | rs142090709<br>0.003233<br>(389/120324) |                                   | No: present in affected son, but not affected father                                          | No                      | B                   |
| Family 35 (II:1) | Congenital cataract                            | <i>EPHA2</i><br>NM_004431.3    | c.1978T>G         | p.Phe660Val                          | nil                                     | High, D, D, P                     | No: present in unaffected father                                                              | Yes                     | US                  |
| Family 38 (II:2) | Congenital cataract                            | <i>OCRL</i><br>NM_001587.3     | c.439+3A>G        | exon6/intron 6 splice site mutation  | rs61752971<br>0.002418<br>(212/87693)   |                                   | N/K: family samples unavailable                                                               | No                      | US                  |

Nucleotide changes are heterozygous unless specified.

D Damaging, P Pathogenic, B Benign, LB Likely Benign, T Tolerated, na not available, N/K not known, US Uncertain Significance. The computational calculations of PhyloP, SIFT, MutationTaster and PolyPhen were performed in Alamut-Visual (Version 2.6, Jan 2015, Interactive Biosoftware, Rouen, France, <http://www.interactive-biosoftware.com/alamut-visual/>).
